# Supplementary material for: Serum Concentration of Antibodies to Mumps, but Not Measles, Rubella, or Varicella, Is Associated with Intake of Dietary Fiber in the NHANES, 1999–2004
Source: MDPI journal article supplement (doi:10.3390/nu13030813), 2021-03-02
Supplement: s1 [file s1]

## Supplementary Materials (SM)

Serum concentration of antibody to Mumps, but not Measles, Rubella, or Varicella, is associated with intake of dietary fiber in the NHANES, 1999-2004

Cynthia B. Van Landingham, Debra R. Keast, Matthew P. Longnecker

### Table of Contents

| Item and brief description                                                              | Page |
|-----------------------------------------------------------------------------------------|------|
| SM Section 1: Definition of immunocompromising conditions or medications                | 2    |
| SM Section 2: Estimation of the effect of measurement error                             | 3    |
| SM Section 3: A discussion of other relevant data on prebiotics and immunogenicity      | 5    |
| SM Figure 1: Directed acyclic graph showing relations among variables                   | 6    |
| SM Figure 2: Reasons for exclusion from the main analysis (Measles, Rubella, Varicella) | 7    |
| SM Figure 3: Reasons for exclusion from the main analysis (Mumps)                       | 8    |
| SM Table 1: Fiber-containing food groups used in the data analysis                      | 9    |
| SM Table 2: Characteristics of subjects in the Mumps analysis                           | 12   |
| SM Table 3: Relation of fiber intake to subject characteristics, Mumps analysis         | 15   |
| SM Table 4: Mumps antibody-fiber association among selected subgroups                   | 18   |
| SM Table 5: Food-group specific fiber associations                                      | 19   |
| SM Table 6: Multiple imputation results                                                 | 20   |
| SM Table 7: Results after exclusion of immunocompromised subjects                       | 21   |

## SM Section 1: Definition of immunocompromising conditions or medications

Following Patel et al. (2019), we excluded people who reported ever having the conditions listed below or who were taking the medications listed below in the past 30 days.

### Conditions:

- Blood cancer
- Leukemia
- Lymphoma
- Renal failure or compromise
- HIV

### Medications:

- Adrenal corticosteroids
- Oncolytics
- Antineoplastics
- Antimetabolites
- Azathioprine
- Bortezomib
- Carbamazepine
- Chlorambucil
- Chlorpromazine
- Clozapine
- Dasatinib
- Gold
- Ibrutinib
- Imatinib
- Lamotrigine
- Mercaptopurine
- Mycophenolate mofetil
- Penicillamine
- Phenytoin
- Rituximab
- Sulphasalazine
- Valproic acid

## SM Section 2: Estimation of the Mumps antibody-fiber association in the absence of measurement error

As noted in the main report, use of one or two 24-hour dietary recalls provided an imprecise measure of usual fiber intake, due to the day-to-day variation in diet. Because we had two 24-hour dietary recalls for each subject in the 2003-2004 NHANES wave, we were able to estimate what the Mumps antibody-fiber association would have been in the absence of this imprecision.

We could de-attenuate the initial estimate of  $\beta_{\text{fiber}}$  based on the fiber intake in one recall but not if we had used the average fiber based on two recalls. So, we fit the models of Mumps using the one 24-hour recall data for subjects from the 1999-2002 waves and the first 24-hour recall data from 2003-2004. We then estimated  $\beta_{\text{fiber-DA}}$  (the de-attenuated estimate) using  $\beta_{\text{fiber}}$  as follows (Keogh et al. 2020):

$$\beta_{\text{fiber-DA}} = \beta_{\text{fiber}} / r$$

Where  $r$  is the Pearson correlation coefficient between the energy-adjusted fiber values of the two 24-hour recalls. Here we are treating the two 24-hour recalls as a replicates study. Because we have a large sample size for the replicates study ( $n=4,148$ ), we assumed no additional variance in the estimate of  $\beta_{\text{fiber-DA}}$  due to the de-attenuation (Fibrinogen Studies Collaboration, 2009), and assumed  $\beta_{\text{fiber-DA}}$  had the same  $t$  as  $\beta_{\text{fiber}}$ . We then repeated this procedure using the second 24-hour recall data for the 2003-2004 subjects (and the single day data for the 1999-2002 subjects), and calculated the inverse variance mean of the two results.

$\beta_{\text{fiber}}$  (and 95% CI) and corresponding % difference in Mumps antibody (and 95% CI) obtained using one 24-hour diet recall\*

|                | $\beta_{\text{fiber}}$  | %Δ in Mumps antibody |
|----------------|-------------------------|----------------------|
| Mumps antibody | 0.0557 (0.0217, 0.0897) | 5.73 (2.20, 9.38)    |

\*The model of Mumps used was otherwise the same as the “full” model in the main report ( $n=12,616$ ); weighted mean results from the use of the first or second recalls for the 2003-2004 subjects (plus the 1999-2002 subjects) are shown.

Pearson correlation coefficients between energy-adjusted dietary fiber from the two diet recalls ( $n=4,148$ )

| No transformation of energy-adjusted fiber | Box Cox transformation of energy-adjusted fiber |
|--------------------------------------------|-------------------------------------------------|
| 0.40                                       | 0.39                                            |

De-attenuated estimates of % difference in Mumps antibody (and 95% CI), with comparison to values based on one or two 24-hour recalls

|                | %Δ in Mumps antibody <sub>fiber-DA</sub> | %Δ in PFAS <sub>fiber-1 or 2 24-h*</sub> | % increase |
|----------------|------------------------------------------|------------------------------------------|------------|
| Mumps antibody | 15.35 (5.73, 25.84)                      | 6.34                                     | 142        |

\* These are the same results shown for the final model in Table 3.

The IQD in energy-adjusted fiber intake for the de-attenuated estimates is 6.0 g/d, as compared with the observed value of 7.7 for the IQD based on one or the average of two 24-hour diet recalls. The IQD for the de-attenuated energy-adjusted fiber intake was calculated with the NRC method (Shaw et al., 2020), using Box Cox transformed values and the distribution of energy-adjusted fiber in the first 24-hour recall. The difference between the de-attenuated and observed IQDs means that the % increase shown above is a slight underestimate.

## References

Fibrinogen Studies Collaboration. Correcting for multivariate measurement error by regression calibration in meta-analyses of epidemiological studies. *Stat Med.* 2009 Mar 30;28(7):1067-92.

Keogh RH, Shaw PA, Gustafson P, Carroll RJ, Deffner V, Dodd KW, Küchenhoff H, Tooze JA, Wallace MP, Kipnis V, Freedman LS. STRATOS guidance document on measurement error and misclassification of variables in observational epidemiology: Part 1-Basic theory and simple methods of adjustment. *Stat Med.* 2020 Jul 20;39(16):2197-2231.

Shaw PA, Gustafson P, Carroll RJ, Deffner V, Dodd KW, Keogh RH, Kipnis V, Tooze JA, Wallace MP, Küchenhoff H, Freedman LS. STRATOS guidance document on measurement error and misclassification of variables in observational epidemiology: Part 2-More complex methods of adjustment and advanced topics. *Stat Med.* 2020 Jul 20;39(16):2232-2263.

### SM Section 3: A discussion of other relevant data on prebiotics and immunogenicity

Response to vaccination for pneumococcus was examined in a small randomized clinical trial of prebiotics in older adults and showed no effect (Bunout et al., 2002). Human breast milk contains microbiota-accessible carbohydrate and has a beneficial effect on the developing immune system (Pretorius et al., 2018). Its effect on vaccine response in observational studies, however, has been mixed for *Haemophilus influenzae* b (Decker et al., 1992; Greenberg et al., 1994; Pabst and Spady 1990; Scheifele et al. 1992; Silverdal et al. 2007); for antibody to pneumococcal serotype 14 antigen one study supported a transient benefit (Silverdal et al., 2007); and for other antibodies the data do not support an increase in concentration (Deforest et al., 1973; John et al., 1976; Pabst et al., 1997; Rennels, 1996).

Bunout D, Hirsch S, Pía de la Maza M, Muñoz C, Haschke F, Steenhout P, et al. Effects of prebiotics on the immune response to vaccination in the elderly. *JPEN J Parenter Enteral Nutr.* 2002 Dec;26(6):372–6.

Decker MD, Edwards KM, Bradley R, Palmer P. Comparative trial in infants of four conjugate *Haemophilus influenzae* type b vaccines. *J Pediatr.* 1992 Feb;120(2 Pt 1):184–9.

Deforest A, Parker PB, DiLiberti JH, Yates HT, Sibinga MS, Smith DS. The effect of breast-feeding on the antibody response of infants to trivalent oral poliovirus vaccine. *J Pediatr.* 1973 Jul;83(1):93–5.

Greenberg DP, Vadheim CM, Partridge S, Chang SJ, Chiu CY, Ward JI. Immunogenicity of *Haemophilus influenzae* type b tetanus toxoid conjugate vaccine in young infants. The Kaiser-UCLA Vaccine Study Group. *J Infect Dis.* 1994 Jul;170(1):76–81.

John TJ, Devarajan LV, Luther L, Vijayarathnam P. Effect of breast-feeding on seroresponse of infants to oral poliovirus vaccination. *Pediatrics.* 1976 Jan;57(1):47–53.

Pabst HF, Spady DW, Pilarski LM, Carson MM, Beeler JA, Krezolek MP. Differential modulation of the immune response by breast- or formula-feeding of infants. *Acta Paediatr.* 1997 Dec;86(12):1291–7.

Pabst HF, Spady DW. Effect of breast-feeding on antibody response to conjugate vaccine. *Lancet.* 1990 Aug 4;336(8710):269–70.

Pretorius R, Prescott SL, Palmer DJ. Taking a prebiotic approach to early immunomodulation for allergy prevention. *Expert Rev Clin Immunol.* 2018;14(1):43–51.

Rennels MB. Influence of breast-feeding and oral poliovirus vaccine on the immunogenicity and efficacy of rotavirus vaccines. *J Infect Dis.* 1996 Sep;174 Suppl 1:S107–111.

Scheifele D, Bjornson GJ, Guasparini R, Friesen B, Meekison W. Breastfeeding and antibody responses to routine vaccination in infants. *Lancet.* 1992 Dec 5;340(8832):1406.

Silverdal SA, Ekholm L, Bodin L. Breastfeeding enhances the antibody response to Hib and Pneumococcal serotype 6B and 14 after vaccination with conjugate vaccines. *Vaccine.* 2007 Feb 9;25(8):1497–502.

OR Figure 1: Directed acyclic graph showing relations among variables

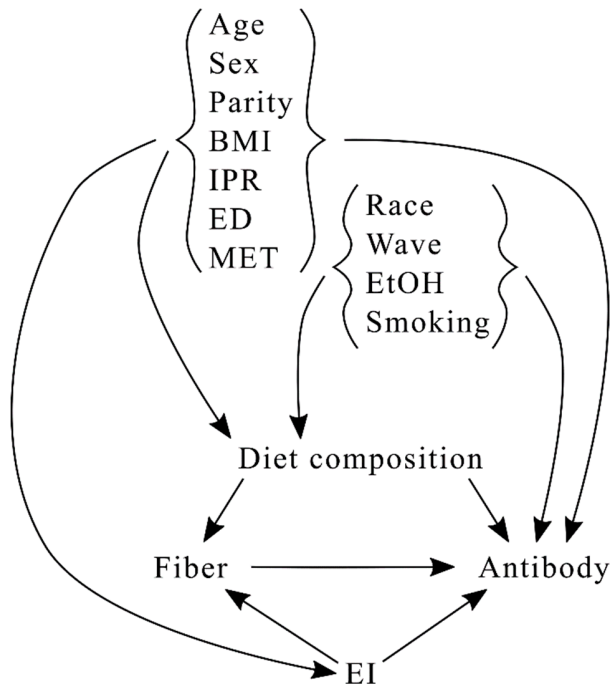

SM Figure 2: Reasons for exclusion from the main analysis (Measles, Rubella, Varicella)

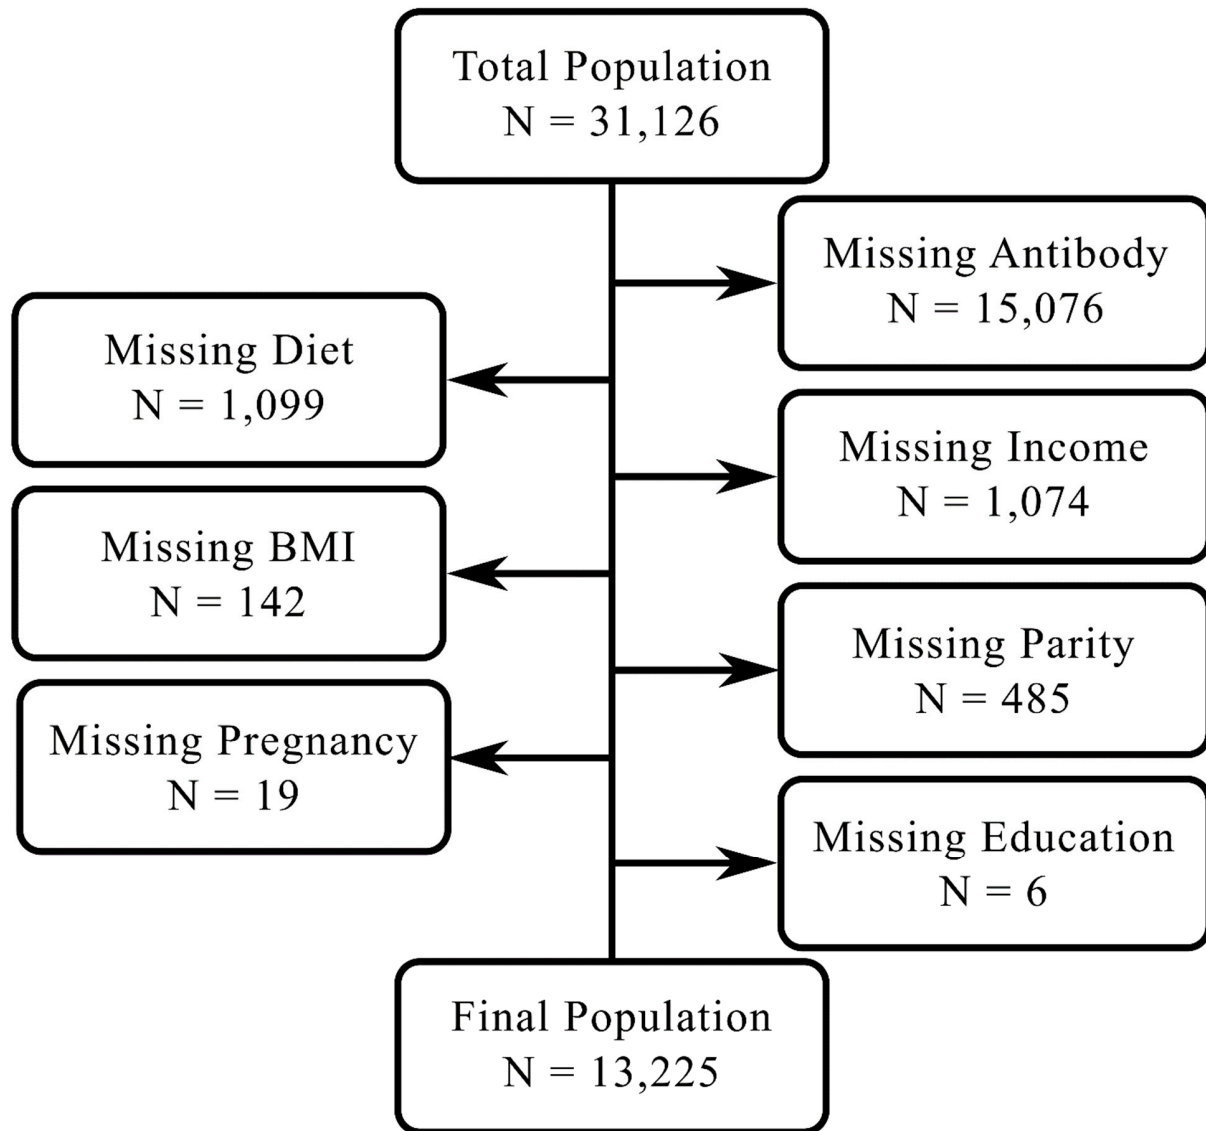

SM Figure 3: Reasons for exclusion from the main analysis (Mumps)

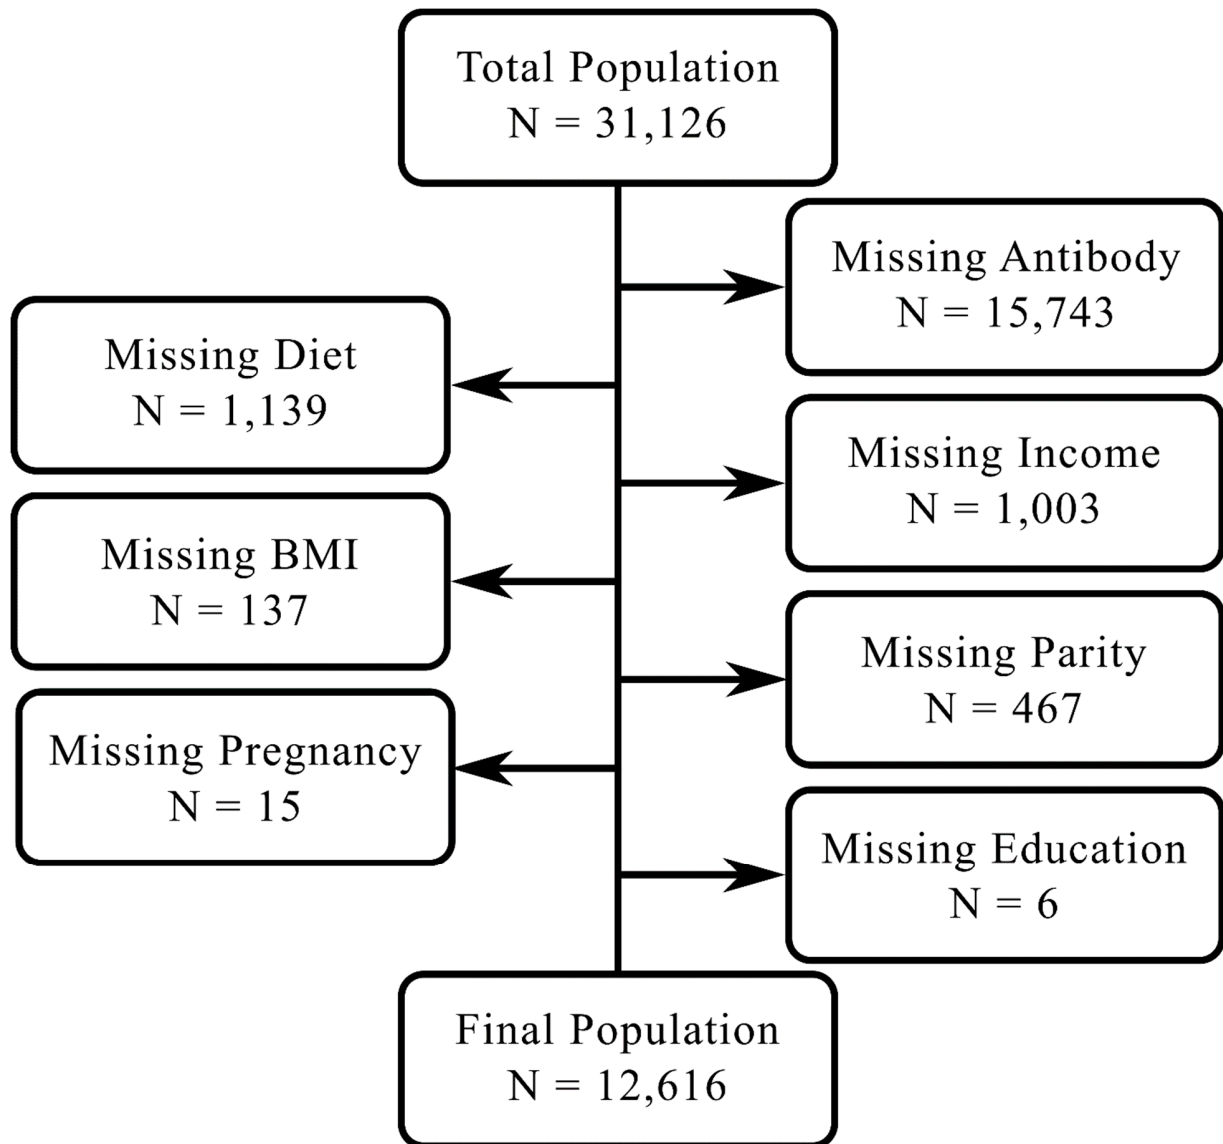



SM Table 1: Mean Dietary Fiber (g/d) Intake Contributed from Selected Food Sources Classified by Recoded What We Eat In America (WWEIA)  
Food Categories: NHANES, 1999-2004, Dietary Sample with Mumps Antibody Data (n = 12,616)\*

| Recoded<br>WWEIA food<br>category code | WWEIA Food Category Description                             | Fiber (g) Intake |   |      |                  |                   |
|----------------------------------------|-------------------------------------------------------------|------------------|---|------|------------------|-------------------|
|                                        |                                                             | Mean             | ± | SE   | Total Pct<br>(%) | Subtot Pct<br>(%) |
| 0                                      | All Food Groups                                             | 15.15            | ± | 0.22 | 100.00           |                   |
| 100                                    | All Specific Food Groups Included in Analyses               | 12.05            | ± | 0.18 | 79.55            | 100.00            |
| 1000                                   | Fruit                                                       | 1.22             | ± | 0.05 | 8.06             | 10.13             |
| 2000                                   | Vegetables                                                  | 2.61             | ± | 0.05 | 17.24            | 21.67             |
| 3000                                   | Plant-based Protein Foods                                   | 1.33             | ± | 0.06 | 8.76             | 11.01             |
| 3100                                   | Beans, peas, legumes                                        | 0.84             | ± | 0.06 | 5.56             | 6.99              |
| 3200                                   | Nuts and seeds                                              | 0.43             | ± | 0.03 | 2.83             | 3.55              |
| 3300                                   | Processed soy products                                      | 0.06             | ± | 0.02 | 0.38             | 0.47              |
| 4000                                   | Grain Foods, Grain-Based Mixed Dishes, Pizza and Sandwiches | 5.13             | ± | 0.10 | 33.84            | 42.54             |
| 4100                                   | Grain Foods                                                 | 3.40             | ± | 0.09 | 22.42            | 28.18             |
| 4200                                   | Grain-based Mixed Dishes, Pizza and Sandwiches              | 1.73             | ± | 0.03 | 11.42            | 14.35             |
| 4210                                   | Grain-based Mixed Dishes                                    | 0.82             | ± | 0.04 | 5.43             | 6.83              |
| 4220                                   | Pizza                                                       | 0.61             | ± | 0.02 | 4.03             | 5.07              |
| 4230                                   | Sandwiches (single code)                                    | 0.30             | ± | 0.01 | 1.95             | 2.46              |

|      |                                                                               |      |   |      |       |       |
|------|-------------------------------------------------------------------------------|------|---|------|-------|-------|
| 5000 | Savory Snacks, Crackers, Snack/meal Bars, and Sweet Baked Goods               | 1.77 | ± | 0.03 | 11.65 | 14.65 |
| 5100 | Savory Snacks and Crackers                                                    | 1.08 | ± | 0.03 | 7.14  | 8.97  |
| 5200 | Snack/M meal Bars and Sweet Bakery Products                                   | 0.68 | ± | 0.02 | 4.52  | 5.68  |
| 6000 | Non-specific Food Groups Included in Analyses as One Group                    | 3.10 | ± | 0.09 | 20.45 |       |
| 6100 | Fruit and Vegetable Juices                                                    | 0.18 | ± | 0.01 | 1.19  |       |
| 6110 | Fruit Juices                                                                  | 0.16 | ± | 0.01 | 1.05  |       |
| 6120 | Vegetable Juices                                                              | 0.02 | ± | 0.01 | 0.14  |       |
| 6200 | Mixed Dishes Not Included with Grain Foods                                    | 1.46 | ± | 0.08 | 9.63  |       |
| 6210 | Mixed Dishes Mainly Meat, Poultry, or Seafood                                 | 0.46 | ± | 0.03 | 3.05  |       |
| 6220 | Asian Mixed Dishes                                                            | 0.18 | ± | 0.02 | 1.18  |       |
| 6230 | Mexican Mixed Dishes                                                          | 0.54 | ± | 0.07 | 3.57  |       |
| 6240 | Soups                                                                         | 0.28 | ± | 0.02 | 1.83  |       |
| 6300 | Protein/nutritional powders and foods not included in a category              | 0.05 | ± | 0.02 | 0.31  |       |
| 6400 | Other Foods and Beverages                                                     | 1.41 | ± | 0.04 | 9.32  |       |
| 6410 | Animal-based Protein Foods                                                    | 0.14 | ± | 0.01 | 0.93  |       |
| 6420 | Milk and Dairy                                                                | 0.22 | ± | 0.01 | 1.47  |       |
| 6430 | Nonalcoholic Beverages (excluding 100% Juice), Alcoholic Beverages, and Water | 0.19 | ± | 0.01 | 1.25  |       |
| 6440 | Fats and Oils, Condiments and Sauces, Sugars, Infant Formula and Baby Food    | 0.47 | ± | 0.02 | 3.09  |       |
| 6450 | Candy and Other Desserts                                                      | 0.39 | ± | 0.02 | 2.58  |       |

\*Sample-weighted mean and standard error are estimated using SUDAAN.

The food groups used in the analysis ( $n = 6$ ) are in column two. The subgroups of those shown in columns 3 and 4 are for explanatory reasons only.

SM Table 2. Characteristics of NHANES subjects 1999-2004 included in the main analyses<sup>a</sup>

| Characteristic                                     | Median (and quartiles),<br>or percent (n = 12616) |
|----------------------------------------------------|---------------------------------------------------|
| Age                                                | 28 (16, 38)                                       |
| Sex                                                |                                                   |
| Female                                             | 48.0                                              |
| Male                                               | 52.0                                              |
| Race/Ethnicity                                     |                                                   |
| Mexican American                                   | 10.2                                              |
| Other Hispanic                                     | 5.9                                               |
| Non-Hispanic White                                 | 66.6                                              |
| Non-Hispanic Black                                 | 12.1                                              |
| Other Race                                         | 5.2                                               |
| Education                                          |                                                   |
| < 9th grade                                        | 24.5                                              |
| Grades 9 to 11                                     | 15.4                                              |
| High School or GED (includes those in Grade 12)    | 19.3                                              |
| Some College                                       | 23.4                                              |
| College                                            | 17.4                                              |
| Income-Poverty Ratio                               | 2.6 (1.2, 4.5)                                    |
| Survey Year                                        |                                                   |
| 1999-2000                                          | 27.8                                              |
| 2001-2002                                          | 35.6                                              |
| 2003-2004                                          | 36.6                                              |
| BMI (kg/m <sup>2</sup> )                           | 24.8 (20.8, 29.5)                                 |
| 0 children                                         | 41.5                                              |
| 1 child                                            | 15.6                                              |
| 2 or more                                          | 42.9                                              |
| Pregnant (females, ages 12 - 49) <sup>b</sup>      | 4.8                                               |
| Breastfeeding (females, ages 12 - 49) <sup>b</sup> | 2.6                                               |
| Smoking (ages 12 - 49) <sup>c</sup>                |                                                   |
| Never [<100 lifetime cigarettes]                   | 57.5                                              |
| Former [not current smoker]                        | 17.4                                              |
| Smoker [< 1 pack per day]                          | 15.2                                              |
| Heavy Smoker [≥ 1 pack per day]                    | 9.9                                               |
| (cont.)                                            |                                                   |

(cont.)

Alcohol Use (ages 20 – 49) <sup>d</sup>

|                                           |      |
|-------------------------------------------|------|
| Never [<12 lifetime drinks]               | 11.5 |
| Former [0 drinks last 12 months]          | 1.9  |
| Light Drinker [<1 drink per week]         | 46.7 |
| Drinker [<7 drinks per week]              | 36.7 |
| Heavy Drinker [ $\geq 7$ drinks per week] | 3.2  |

Dietary intake

|                                    |                      |
|------------------------------------|----------------------|
| Crude Dietary Fiber (g/day)        | 13.3 (8.9, 19.3)     |
| Energy Adjusted Fiber (g/day)      | 13.8 (10.7, 18.1)    |
| Energy Adjusted Fiber (g/day) /IUR | 1.8 (1.4, 2.4)       |
| Total Energy Intake (kcal/day)     | 2,164 (1,634, 2,831) |
| Vitamin C (mg)                     | 60.7 (27.8, 123.5)   |
| Vitamin E (mg)                     | 6.3 (4.2, 9.2)       |
| Carotene (mcg RE)                  | 774 (330, 2,269)     |
| Protein (gm)                       | 77.0 (55.6, 104.0)   |
| Selenium (mcg)                     | 98.4 (70.4, 137.1)   |
| Zinc (mg)                          | 10.8 (7.5, 15.7)     |
| Vitamin B6 (mg)                    | 1.7 (1.1, 2.4)       |
| Folate (mcg)                       | 360.7 (247.8, 512.8) |
| Magnesium (mg)                     | 250.4 (179.0, 343.4) |
| Copper (mg)                        | 1.1 (0.8, 1.5)       |
| Vitamin A (mcg)                    | 520.0 (292.9, 853.6) |

Supplements

|                                |                  |
|--------------------------------|------------------|
| Crude Supplement Fiber (g/day) | 0.0 (0.0, 0.0)   |
| Vitamin C (mg)                 | 0.0 (0.0, 47.2)  |
| Vitamin E (mg)                 | 0.0 (0.0, 7.2)   |
| Carotene (mg)                  | 0.0 (0.0, 0.0)   |
| Protein (gm)                   | 0.0 (0.0, 0.0)   |
| Selenium (mcg)                 | 0.0 (0.0, 0.0)   |
| Zinc (mg)                      | 0.0 (0.0, 0.5)   |
| Vitamin B6 (mg)                | 0.0 (0.0, 0.8)   |
| Folate (mcg)                   | 0.0 (0.0, 66.7)  |
| Magnesium (mg)                 | 0.0 (0.0, 0.0)   |
| Copper (mg)                    | 0.0 (0.0, 0.0)   |
| Vitamin A (mcg)                | 0.0 (0.0, 206.6) |

(cont.)

(cont.)

Met-Min/Month (ages 12 - 49) <sup>e</sup>

|           |      |
|-----------|------|
| < 2000    | 27.8 |
| 2000-3999 | 17.7 |
| 4000-5999 | 11.4 |
| 6000-7999 | 9.1  |
| 8000+     | 34.0 |

Antibody concentration (untransformed)

|       |                |
|-------|----------------|
| Mumps | 2.6 (1.7, 3.7) |
|-------|----------------|

---

<sup>a</sup> Values shown are for subjects with data on Mumps.

<sup>b</sup> Females 12-49, n = 5150

<sup>c</sup> With smoking data, n = 8977

<sup>d</sup> With alcohol data, n = 4415

<sup>e</sup> with Met-Min/Month data, n = 7608

SM Table 3. Age-adjusted median amount of energy-adjusted dietary fiber (g/d) according to category of subject characteristic (and quartiles) or Pearson correlation coefficient of energy-adjusted dietary fiber with continuous value of the subject characteristic

| Characteristic                                  | Median or r<br>(n = 12616) <sup>a</sup> |
|-------------------------------------------------|-----------------------------------------|
| Age                                             |                                         |
| 6 to < 12 years                                 | 13.7 (11.4, 16.4)                       |
| 12 to < 20 years                                | 12.7 (10.2, 16.2)                       |
| 20 - 49 years                                   | 14.3 (10.7, 19.2)                       |
| Sex                                             |                                         |
| Female                                          | 14.2 (11.4, 18.0)                       |
| Male                                            | 13.4 (10.0, 18.2)                       |
| Race/Ethnicity                                  |                                         |
| Mexican American                                | 16.0 (12.3, 21.5)                       |
| Other Hispanic                                  | 14.0 (11.3, 18.2)                       |
| Non-Hispanic White                              | 13.9 (10.7, 18.3)                       |
| Non-Hispanic Black                              | 12.1 (9.6, 15.3)                        |
| Other Race                                      | 12.6 (9.6, 16.9)                        |
| Education                                       |                                         |
| < 9th grade                                     | 13.7 (11.2, 16.9)                       |
| Grades 9 to 11                                  | 12.5 (9.5, 16.4)                        |
| High School or GED (includes those in Grade 12) | 12.8 (9.5, 16.8)                        |
| Some College                                    | 13.9 (10.9, 18.6)                       |
| College                                         | 16.7 (12.7, 22.7)                       |
| Income-Poverty Ratio                            |                                         |
| 1st Tertile                                     | 13.2 (10.2, 17.1)                       |
| 2nd Tertile                                     | 13.4 (10.3, 17.5)                       |
| 3rd Tertile                                     | 14.8 (11.4, 19.8)                       |
| Survey Year                                     |                                         |
| 1999-2000                                       | 13.2 (10.0, 17.8)                       |
| 2001-2002                                       | 13.8 (10.6, 18.4)                       |
| 2003-2004                                       | 14.2 (11.3, 18.1)                       |
| BMI (kg/m <sup>2</sup> )                        | -0.05                                   |
| Parity (females, aged 12-49) <sup>b</sup>       |                                         |
| 0 children                                      | 14.3 (11.4, 18.6)                       |
| 1 child                                         | 14.0 (10.9, 18.3)                       |
| 2 or more                                       | 14.2 (11.3, 18.6)                       |
| Pregnant (females, ages 12 - 49) <sup>b</sup>   |                                         |
| No                                              | 14.2 (11.3, 18.4)                       |
| Yes                                             | 15.0 (11.6, 19.6)                       |
| (cont.)                                         |                                         |

(cont.)

Breastfeeding (females, ages 12 - 49) <sup>b</sup>

No 14.2 (11.3, 18.4)

Yes 15.5 (12.1, 21.7)

Smoking (ages 12 - 49) <sup>c</sup>

Never [<100 lifetime cigarettes] 14.8 (11.2, 19.5)

Former [not current smoker] 15.0 (11.7, 20.6)

Smoker [< 1 pack per day] 12.0 (9.1, 15.8)

Heavy Smoker [ $\geq$  1 pack per day] 10.8 (8.0, 14.2)

Alcohol Use (ages 20 - 49) <sup>d</sup>

Never [<12 lifetime drinks] 15.4 (11.8, 20.5)

Former [0 drinks last 12 months] 13.5 (9.6, 19.3)

Light Drinker [<1 drink per week] 14.2 (10.8, 18.9)

Drinker [<7 drinks per week] 13.9 (10.0, 19.0)

Heavy Drinker [ $\geq$ 7 drinks per week] 13.4 (10.2, 20.5)

Dietary intake

Vitamin C (mg) 0.27

Vitamin E (mg) 0.27

Carotene (mcg RE) 0.25

Protein (gm) 0.08

Selenium (mcg) 0.07

Zinc (mg) 0.14

Vitamin B6 (mg) 0.29

Folate (mcg) 0.43

Magnesium (mg) 0.67

Copper (mg) 0.34

Vitamin A (mcg) 0.17

Supplements

Crude Supplement Fiber (g/day) 0.01

Vitamin C (mg) -0.00

Vitamin E (mg) -0.00

Carotene (mg) 0.04

Protein (gm) 0.06

Selenium (mcg) 0.04

Zinc (mg) 0.08

Vitamin B6 (mg) 0.05

Folate (mcg) 0.08

Magnesium (mg) 0.06

Copper (mg) 0.06

Vitamin A (mcg) 0.00

(cont.)



(cont.)

Met-Min/Month (ages 12 - 49) <sup>e</sup>

|           |                   |
|-----------|-------------------|
| < 2000    | 13.5 (10.3, 18.2) |
| 2000-3999 | 14.7 (11.0, 18.9) |
| 4000-5999 | 14.5 (11.4, 19.8) |
| 6000-7999 | 14.1 (10.8, 19.0) |
| 8000+     | 14.4 (10.7, 19.5) |

---

<sup>a</sup> Results shown are for subjects with data on Mumps

<sup>b</sup> Females 12-49, n = 5150

<sup>c</sup> With smoking data, n = 8977

<sup>d</sup> with alcohol data, n = 4415

<sup>e</sup> with Met-Min/Month data, n = 7608

SM Table 4. Fully-adjusted percent difference in Mumps antibody concentration (%Δ) per interquartile range increment in dietary fiber intake (and 95% confidence interval), according to age group or tertile of income-to-poverty ratio<sup>a</sup>

| Modifying Factor                  | %Δ    | (95% CI)        |
|-----------------------------------|-------|-----------------|
| Age                               |       |                 |
| < 12                              | 5.18  | (-11.49, 24.98) |
| 12–19                             | 8.32  | (2.85, 14.07)   |
| 20+                               | 6.55  | (2.69, 10.55)   |
| Income-to-poverty ratio (tertile) |       |                 |
| < 1.65                            | 1.36  | (-4.42, 7.48)   |
| >=1.65 and < 3.86                 | 6.30  | (-2.31, 15.68)  |
| >=3.86                            | 10.70 | ( 2.59, 19.47)  |

<sup>a</sup> Adjusted for all factors listed in Table 2. Mumps results are based on quadratic model for fiber.

SM Table 5.  $\beta$  coefficients from a fully-adjusted model of  $\ln(\text{Mumps antibody concentration})$  for fiber in g/d day from six groups of fiber-containing foods ( $n = 12,616$ ). Results are adjusted for energy intake.

| Food group                                                      | $\beta$ | Standard Error of $\beta$ |
|-----------------------------------------------------------------|---------|---------------------------|
| Fruits                                                          | 0.0073  | 0.0047                    |
| Vegetables                                                      | 0.0038  | 0.0031                    |
| Plant-based Protein Foods                                       | 0.0023  | 0.0021                    |
| Grain Foods, Grain-Based Mixed Dishes, Pizza and Sandwiches     | 0.0085  | 0.0021                    |
| Savory Snacks, Crackers, Snack/meal Bars, and Sweet Baked Goods | -0.0086 | 0.0035                    |
| All other foods                                                 | 0.0011  | 0.0026                    |

F-test for improvement in model fit as compared with that used for Mumps in Table 3,  $p < 0.000001$

SM Table 6. Results from multiple imputation analysis. Fully-adjusted percent difference (%Δ) in antibody concentration per interquartile range increment in energy-adjusted fiber (and 95% confidence interval).<sup>a</sup>

| Antibody type | %Δ    | (95% CI)      |
|---------------|-------|---------------|
| Measles       | 0.37  | (-4.15, 5.10) |
| Mumps         | 5.93  | (2.91, 9.04)  |
| Rubella       | 0.99  | (-3.87, 6.09) |
| Varicella     | -2.46 | (-6.06, 1.28) |

<sup>a</sup> Adjusted for all the factors listed in Table 2.

Mumps results are based on quadratic model for fiber. The number of subjects for the analyses of Measles, Rubella, and Varicella was 14951; for Mumps it was 14244.

SM Table 7. Results after excluding subjects who had medical conditions or therapeutic drug use (past 30 days) associated with secondary antibody deficiency. Fully-adjusted percent difference (%Δ) in antibody concentration per interquartile range increment in energy-adjusted fiber (and 95% confidence interval).<sup>a</sup>

| Antibody type | %Δ    | (95% CI)      |
|---------------|-------|---------------|
| Measles       | 0.32  | (-4.72, 5.63) |
| Mumps         | 5.31  | (0.80, 10.02) |
| Rubella       | 0.65  | (-4.71, 6.32) |
| Varicella     | -2.93 | (-6.63, 0.92) |

<sup>a</sup> Adjusted for all the factors listed in Table 3. Mumps results are based on quadratic model for fiber. The number of subjects in the analyses for Measles, Rubella, and Varicella was 12721; for Mumps it was 12153.
